# Supplementary material for: Effectiveness of vaccination against SARS-CoV-2 infection and Covid-19 hospitalization among Finnish elderly and chronically ill – An interim analysis of a nationwide cohort study
Source: bioRxiv or medRxiv preprint supplement (doi:10.1101/2021.06.21.21258686), 2021-06-28
Supplement: Supplementary file [file media-1.pdf]

**Supplementary Table 1:** Definition of medical conditions (highly) predisposing to severe Covid-19.

| Medical condition                                        | Classification | Codes                                                                                                                                                                                                              | Register |
|----------------------------------------------------------|----------------|--------------------------------------------------------------------------------------------------------------------------------------------------------------------------------------------------------------------|----------|
| <b>Highly predisposing to severe Covid-19</b>            |                |                                                                                                                                                                                                                    |          |
| Organ or stem cell transplant                            | ICD-10         | T86, Z94                                                                                                                                                                                                           | 1,2      |
| Active cancer treatment                                  | ICD-10         | C00–C97 (except C44),<br>D05.1, D39                                                                                                                                                                                | 1,2      |
| Severe disorders of the immune system                    | ICD-10         | D70.8, D80–D84, E31.00                                                                                                                                                                                             | 2        |
| Severe chronic renal disease                             | ICD-10         | I12, I13, N00–N05, N07,<br>N08, N11, N14, N18, N19,<br>E10.2, E11.2, E14.2                                                                                                                                         | 1,2      |
| Asthma requiring continuous medication                   | ICD-10         | J45, J46                                                                                                                                                                                                           | 2, 3     |
|                                                          | ICPC-2         | R96                                                                                                                                                                                                                | 3        |
| Severe chronic pulmonary disease                         | ICD-10         | J41–J44, J47, Z90.2                                                                                                                                                                                                | 2        |
| Type 2 diabetes requiring medication                     | ICD-10         | E11, E13, E14                                                                                                                                                                                                      | 2,3      |
|                                                          | ICPC-2         | T90                                                                                                                                                                                                                | 3        |
| Blood glucose lowering drugs, excluding insulin          | ATC            | A10B                                                                                                                                                                                                               | 4        |
| Down syndrome                                            | ICD-10         | Q90                                                                                                                                                                                                                | 2, 3     |
| <b>Predisposing to severe Covid-19</b>                   |                |                                                                                                                                                                                                                    |          |
| Severe heart disease                                     | ICD-10         | I11–I13, I15, I20–I25, I50                                                                                                                                                                                         | 1, 2     |
| Neurological illness or condition that affects breathing | ICD-10         | G70–G73, G80–G83, I60–<br>I69                                                                                                                                                                                      | 2        |
| Immunosuppressive drug therapy for autoimmune disease    |                |                                                                                                                                                                                                                    |          |
| Autoimmune disease                                       | ICD-10         | D86, K50, K51, L40, M02,<br>M05–M07, M13.9, M45,<br>M46.0, M46.1, M46.9,<br>M94.1                                                                                                                                  | 1, 2     |
| Immunosuppressive drug therapy                           | ATC            | H02AB02, H02AB04,<br>H02AB06, H02AB07,<br>L01BA01, L01XC02,<br>L04AA06, L04AA10,<br>L04AA13, L04AA18,<br>L04AA24, L04AA26,<br>L04AA29, L04AA33,<br>L04AA37, L04AB, L04AC,<br>L04AD01, L04AD02,<br>L04AX01, L04AX03 | 4        |
| Severe chronic liver disease                             | ICD-10         | K70.2, K70.3, K70.4, K71–<br>K74                                                                                                                                                                                   | 2        |
| Type 1 diabetes                                          | ICD-10         | E10                                                                                                                                                                                                                | 2, 3     |
|                                                          | ICPC-2         | T89                                                                                                                                                                                                                | 3        |
| Insulin and analogues                                    | ATC            | A10A                                                                                                                                                                                                               | 4        |
| Adrenal insufficiency                                    | ICD-10         | E25.0, E27.1, E27.2, E27.4,<br>E31.00, E31.01, E31.08,<br>E89.6                                                                                                                                                    | 1, 2     |
| Sleep apnea                                              | ICD-10         | G47.3                                                                                                                                                                                                              | 2, 3     |
| Continuous positive airway pressure therapy              | NCSP           | WX723, WX780                                                                                                                                                                                                       | 2        |
| Psychotic disorders                                      | ICD-10         | F20–F29                                                                                                                                                                                                            | 2, 3     |
|                                                          | ICPC-2         | P72                                                                                                                                                                                                                | 3        |
| Clozapine                                                | ATC            | N05AH02                                                                                                                                                                                                            | 4        |

ATC, Anatomical Therapeutic Chemical Classification System; ICD-10, International Statistical Classification of Diseases and Related Health Problems, tenth revision; ICPC-2, International Classification of Primary Care, second edition; NCSP, Nordic Nomesco Classification of Surgical Procedures.

Registers: 1, Special Reimbursement Register for Medicine Expenses; 2, Care Register for Health Care; 3, Register of Primary Health Care Visits; 4, Prescription Centre database.

**Supplementary Table 2:** Distribution of baseline characteristics and percentage vaccinated first with mRNA or adenovirus vector (AdV) vaccine, Finnish elderly aged 70+ years.

|                                                                        | Number of study subjects | Percentage vaccinated first with |             |
|------------------------------------------------------------------------|--------------------------|----------------------------------|-------------|
|                                                                        |                          | mRNA vaccine                     | AdV vaccine |
| <b>Age in years</b>                                                    |                          |                                  |             |
| 70-74                                                                  | 353956                   | 79                               | 10          |
| 75-79                                                                  | 231915                   | 86                               | 4           |
| 80-89                                                                  | 258389                   | 89                               | 1           |
| 90+                                                                    | 56832                    | 83                               | 1           |
| <b>Sex</b>                                                             |                          |                                  |             |
| Male                                                                   | 384170                   | 83                               | 6           |
| Female                                                                 | 516922                   | 85                               | 5           |
| <b>Presence of medical conditions predisposing to severe Covid-19</b>  |                          |                                  |             |
| No predisposing medical condition                                      | 376668                   | 83                               | 6           |
| At least one highly predisposing medical condition                     | 314949                   | 85                               | 5           |
| At least one predisposing but no highly predisposing medical condition | 209475                   | 85                               | 5           |
| <b>In Helsinki-Uusimaa hospital district</b>                           |                          |                                  |             |
| No                                                                     | 685004                   | 83                               | 6           |
| Yes                                                                    | 216088                   | 87                               | 2           |
| <b>In long-term care</b>                                               |                          |                                  |             |
| No                                                                     | 851206                   | 84                               | 5           |
| Yes                                                                    | 49886                    | 85                               | 0           |

**Supplementary Table 3:** Distribution of baseline characteristics and percentage vaccinated first with mRNA or adenovirus vector (AdV) vaccine, chronically ill aged 16–69 years.

|                                                                        | Number of study subjects | Percentage vaccinated first with |             |
|------------------------------------------------------------------------|--------------------------|----------------------------------|-------------|
|                                                                        |                          | mRNA vaccine                     | AdV vaccine |
| <b>Age in years</b>                                                    |                          |                                  |             |
| 16-38                                                                  | 151887                   | 33                               | 4           |
| 39-51                                                                  | 151543                   | 50                               | 10          |
| 52-59                                                                  | 173280                   | 58                               | 19          |
| 60-64                                                                  | 138227                   | 55                               | 28          |
| 65-69                                                                  | 159589                   | 32                               | 54          |
| <b>Sex</b>                                                             |                          |                                  |             |
| Male                                                                   | 403410                   | 44                               | 24          |
| Female                                                                 | 371116                   | 48                               | 22          |
| <b>Presence of medical conditions predisposing to severe Covid-19</b>  |                          |                                  |             |
| At least one highly predisposing medical condition                     | 329664                   | 38                               | 37          |
| At least one predisposing but no highly predisposing medical condition | 444862                   | 51                               | 12          |
| <b>In Helsinki-Uusimaa hospital district</b>                           |                          |                                  |             |
| No                                                                     | 567944                   | 46                               | 22          |
| Yes                                                                    | 206582                   | 44                               | 27          |

**Supplementary Table 4:** Crude and adjusted hazard ratios comparing the hazard of confirmed SARS-CoV-2 infection or Covid-19 hospitalization in study subjects who received exactly 1 or 2 doses of mRNA vaccine with the corresponding hazard in the unvaccinated, Finnish elderly aged 70+ years.

|                    | SARS-CoV-2 infection |       |       |                       |       |       | Covid-19 hospitalization |       |       |                       |       |       |
|--------------------|----------------------|-------|-------|-----------------------|-------|-------|--------------------------|-------|-------|-----------------------|-------|-------|
|                    | Crude hazard ratio   |       |       | Adjusted hazard ratio |       |       | Crude hazard ratio       |       |       | Adjusted hazard ratio |       |       |
|                    | Est.                 | LCI   | UCI   | Est.                  | LCI   | UCI   | Est.                     | LCI   | UCI   | Est.                  | LCI   | UCI   |
| <b>First dose</b>  |                      |       |       |                       |       |       |                          |       |       |                       |       |       |
| 0-6 DSV            | 0.773                | 0.624 | 0.956 | 0.669                 | 0.541 | 0.827 | 0.465                    | 0.270 | 0.801 | 0.425                 | 0.246 | 0.733 |
| 7-13 DSV           | 0.846                | 0.684 | 1.046 | 0.707                 | 0.572 | 0.875 | 0.644                    | 0.400 | 1.038 | 0.577                 | 0.357 | 0.931 |
| 14-20 DSV          | 0.766                | 0.607 | 0.966 | 0.618                 | 0.490 | 0.780 | 0.831                    | 0.538 | 1.285 | 0.734                 | 0.473 | 1.138 |
| 21-27 DSV          | 0.745                | 0.581 | 0.956 | 0.589                 | 0.459 | 0.755 | 0.498                    | 0.286 | 0.869 | 0.433                 | 0.248 | 0.758 |
| 28-34 DSV          | 0.693                | 0.527 | 0.911 | 0.534                 | 0.406 | 0.701 | 0.470                    | 0.263 | 0.841 | 0.414                 | 0.231 | 0.742 |
| 35-41 DSV          | 0.735                | 0.554 | 0.976 | 0.545                 | 0.411 | 0.722 | 0.411                    | 0.218 | 0.774 | 0.360                 | 0.191 | 0.680 |
| 42+ DSV            | 0.827                | 0.680 | 1.004 | 0.535                 | 0.441 | 0.650 | 0.386                    | 0.253 | 0.587 | 0.321                 | 0.208 | 0.496 |
| <b>Second dose</b> |                      |       |       |                       |       |       |                          |       |       |                       |       |       |
| 0-6 DSV            | 0.300                | 0.123 | 0.728 | 0.153                 | 0.063 | 0.371 | 0.267                    | 0.064 | 1.108 | 0.209                 | 0.050 | 0.877 |
| 7+ DSV             | 0.725                | 0.530 | 0.990 | 0.250                 | 0.181 | 0.347 | 0.087                    | 0.021 | 0.355 | 0.072                 | 0.017 | 0.300 |

DSV, day since vaccination; Est., Point estimate; LCI, lower 95% confidence interval limit; UCI, upper 95% confidence

interval limit

**Supplementary Table 5:** Crude and adjusted hazard ratios comparing the hazard of confirmed SARS-CoV-2 infection or Covid-19 hospitalization in study subjects who received exactly 1 or 2 doses of mRNA vaccine with the corresponding hazard in the unvaccinated, chronically ill aged 16–69 years.

|                    | SARS-CoV-2 infection |       |       |                       |       |       | Covid-19 hospitalization |       |       |                       |       |       |
|--------------------|----------------------|-------|-------|-----------------------|-------|-------|--------------------------|-------|-------|-----------------------|-------|-------|
|                    | Crude hazard ratio   |       |       | Adjusted hazard ratio |       |       | Crude hazard ratio       |       |       | Adjusted hazard ratio |       |       |
|                    | Est.                 | LCI   | UCI   | Est.                  | LCI   | UCI   | Est.                     | LCI   | UCI   | Est.                  | LCI   | UCI   |
| <b>First dose</b>  |                      |       |       |                       |       |       |                          |       |       |                       |       |       |
| 0-6 DSV            | 0.568                | 0.438 | 0.737 | 0.612                 | 0.472 | 0.794 | 0.142                    | 0.035 | 0.574 | 0.129                 | 0.032 | 0.521 |
| 7-13 DSV           | 0.605                | 0.462 | 0.792 | 0.664                 | 0.506 | 0.870 | 0.242                    | 0.077 | 0.763 | 0.218                 | 0.069 | 0.687 |
| 14-20 DSV          | 0.519                | 0.380 | 0.708 | 0.575                 | 0.421 | 0.785 | 0.569                    | 0.249 | 1.304 | 0.511                 | 0.223 | 1.171 |
| 21-27 DSV          | 0.532                | 0.378 | 0.749 | 0.587                 | 0.417 | 0.827 | 0.120                    | 0.017 | 0.862 | 0.106                 | 0.015 | 0.764 |
| 28-34 DSV          | 0.392                | 0.251 | 0.614 | 0.424                 | 0.271 | 0.664 | 0.162                    | 0.022 | 1.168 | 0.139                 | 0.019 | 1.008 |
| 35-41 DSV          | 0.386                | 0.222 | 0.670 | 0.411                 | 0.236 | 0.714 | Not estimated            |       |       | Not estimated         |       |       |
| 42+ DSV            | 0.686                | 0.506 | 0.928 | 0.857                 | 0.632 | 1.161 | 0.411                    | 0.131 | 1.287 | 0.410                 | 0.131 | 1.288 |
| <b>Second dose</b> |                      |       |       |                       |       |       |                          |       |       |                       |       |       |
| 0-6 DSV            | 0.115                | 0.016 | 0.817 | 0.127                 | 0.018 | 0.906 | Not estimated            |       |       | Not estimated         |       |       |
| 7+ DSV             | 0.217                | 0.139 | 0.336 | 0.227                 | 0.146 | 0.353 | 0.095                    | 0.013 | 0.678 | 0.100                 | 0.014 | 0.710 |

DSV, day since vaccination; Est., Point estimate; LCI, lower 95% confidence interval limit; UCI, upper 95% confidence

interval limit

**Supplementary Table 6:** Crude and adjusted hazard ratios comparing the hazard of confirmed SARS-CoV-2 infection or Covid-19 hospitalization in study subjects who received exactly 1 or 2 doses of adenovirus vector vaccine with the corresponding hazard in the unvaccinated, chronically ill aged 16–69 years.

|                    | SARS-CoV-2 infection |       |       |                       |       |       | Covid-19 hospitalization |       |       |                       |       |       |
|--------------------|----------------------|-------|-------|-----------------------|-------|-------|--------------------------|-------|-------|-----------------------|-------|-------|
|                    | Crude hazard ratio   |       |       | Adjusted hazard ratio |       |       | Crude hazard ratio       |       |       | Adjusted hazard ratio |       |       |
|                    | Est.                 | LCI   | UCI   | Est.                  | LCI   | UCI   | Est.                     | LCI   | UCI   | Est.                  | LCI   | UCI   |
| <b>First dose</b>  |                      |       |       |                       |       |       |                          |       |       |                       |       |       |
| 0-6 DSV            | 0.492                | 0.373 | 0.649 | 0.599                 | 0.453 | 0.791 | 0.188                    | 0.047 | 0.757 | 0.157                 | 0.039 | 0.633 |
| 7-13 DSV           | 0.656                | 0.514 | 0.836 | 0.804                 | 0.630 | 1.027 | 1.163                    | 0.666 | 2.029 | 0.961                 | 0.548 | 1.685 |
| 14-20 DSV          | 0.498                | 0.373 | 0.665 | 0.620                 | 0.464 | 0.830 | 1.024                    | 0.560 | 1.874 | 0.838                 | 0.456 | 1.541 |
| 21-27 DSV          | 0.605                | 0.458 | 0.799 | 0.764                 | 0.578 | 1.011 | 0.414                    | 0.154 | 1.112 | 0.335                 | 0.124 | 0.903 |
| 28-34 DSV          | 0.406                | 0.281 | 0.587 | 0.518                 | 0.358 | 0.748 | 0.117                    | 0.016 | 0.831 | 0.093                 | 0.013 | 0.666 |
| 35-41 DSV          | 0.505                | 0.350 | 0.730 | 0.635                 | 0.438 | 0.919 | 0.815                    | 0.360 | 1.843 | 0.638                 | 0.281 | 1.449 |
| 42+ DSV            | 0.401                | 0.318 | 0.507 | 0.497                 | 0.393 | 0.630 | 0.564                    | 0.327 | 0.973 | 0.423                 | 0.243 | 0.736 |
| <b>Second dose</b> |                      |       |       |                       |       |       |                          |       |       |                       |       |       |
| 0-6 DSV            | 0.687                | 0.220 | 2.147 | 1.375                 | 0.439 | 4.309 | Not estimated            |       |       | Not estimated         |       |       |
| 7+ DSV             | Not estimated        |       |       | Not estimated         |       |       | Not estimated            |       |       | Not estimated         |       |       |

DSV, days since vaccination; Est., Point estimate; LCI, lower 95% confidence interval limit; UCI, upper 95% confidence

interval limit
