# Supplementary material for: Effectiveness of vaccination against SARS-CoV-2 infection and Covid-19 hospitalization among Finnish elderly and chronically ill – An interim analysis of a nationwide cohort study
Source: bioRxiv or medRxiv preprint supplement (doi:10.1101/2021.06.21.21258686), 2021-06-28
Supplement: Supplementary file [file media-2.pdf]

Professor Mika Salminen,  
Director of the Department for Health Security  
Finnish Institute for Health and Welfare / Terveyden ja Hyvinvoinnin Laitos  
[Mika.salminen@thl.fi](mailto:Mika.salminen@thl.fi)

To whom it may concern:

Subject: Effectiveness of vaccination against SARS-CoV-2 infection and Covid-19 hospitalization among Finnish elderly and chronically ill – An interim analysis of a nationwide cohort study

As director of the department for Health security of the Finnish Institute for Health and Welfare, I certify that:

- I am the competent authority for assessing whether research requires institutional ethical review or if the Finnish communicable diseases law (Tartuntatautilaki 1227/2016) and the law on the duties of the Finnish institute for Health (Laki Terveyden ja hyvinvoinnin laitoksesta 668/2008) and Welfare allows the implementation of the research without seeking further ethical review.
- The research presented by Baum et al in “**Effectiveness of vaccination against SARS-CoV-2 infection and Covid-19 hospitalization among Finnish elderly and chronically ill – An interim analysis of a nationwide cohort study**” did not require further ethical review before implementation as its aim was to monitor vaccine effectiveness of infectious disease (Tartuntatautilaki 1227/2016).

Helsinki, June 17<sup>th</sup> 2021  
Prof Mika Salminen
